# Supplementary material for: Deep Eutectic Solvents for Efficient Drug Solvation: Optimizing Composition and Ratio for Solubility of β-Cyclodextrin
Source: MDPI journal article supplement (doi:10.3390/pharmaceutics15051462), 2023-05-11
Supplement: s1 [file s1]

# **Supporting Information**

## **Deep Eutectic Solvents for Efficient Drug Solvation: Optimizing Composition and Ratio for Solubility of $\beta$ -cyclodextrin**

Ilan Shumilin, Ahmad Tanbuz and Daniel Harries<sup>a)</sup>

*Institute of Chemistry, The Fritz Haber Research Center, and The Harvey M. Krueger Family Center  
for Nanoscience and Nanotechnology, Edmond J. Safra Campus, The Hebrew University, Jerusalem  
9190401, Israel*

<sup>a)</sup> Corresponding author: [Daniel.Harries@mail.huji.ac.il](mailto:Daniel.Harries@mail.huji.ac.il)

## S1. Optical rotation of $\beta$ -cyclodextrin

The solubility of  $\beta$ -CD in solution was determined using a calibration curve of the optical rotation,  $\Theta$ , measured with known molar concentrations of  $\beta$ -CD, and interpolated with linear regression as shown in Figure S1.

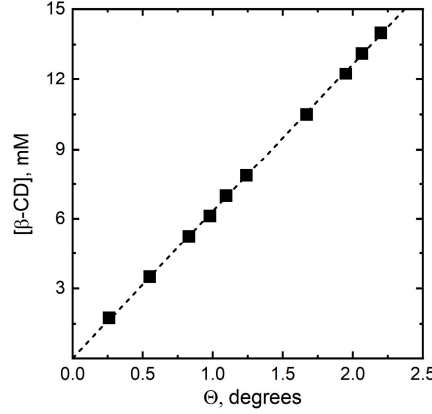

**Figure S1:** Optical rotation of aqueous  $\beta$ -CD solutions. The dashed line represents the linear fit,  $[\beta\text{-CD}] = 0.00633 \times \Theta$

## S2. Calculation of $\beta$ -CD chemical potential using solubility measurements

Compared with water and the concentration of the DES components,  $\beta$ -CD is significantly dilute, so that we can use the Van' t Hoff limit, and the chemical potential of  $\beta$ -CD can be written as:

$$\mu_{CD}(m_{cc}, m_u) = \mu_{CD}^0(m_{cc}, m_u) + RT \ln \frac{C_{CD}}{C_{CD}^0} \quad (\text{S1})$$

where  $\mu_{CD}^0$  is the standard chemical potential for a reference state of  $C_{CD}^0 = 1 \text{ mol} / L$  in a solution with CC and urea concentrations of  $m_{CC}$  and  $m_u$ . This expression therefore assumes that the activity coefficient is not much different than unity. At equilibrium, for all saturated  $\beta$ -CD solutions the chemical potential of  $\beta$ -CD must be equal to its chemical potential in the precipitated (solid) state:

$$\mu_{CD}^{precipitate} = \mu_{CD}(m_{CC}, m_u) = \mu_{CD}^0(m_{CC}, m_u) + RT \ln C_{CD}^{sat} \quad (\text{S2})$$

By differentiating Eq. (S2) with respect to the concentration of one of the DES components (as long as the solution remains saturated):

$$d\mu_{CD}^0(m_{CC}, m_u) = -RT d \ln C_{CD}^{sat} \quad (\text{S3})$$

Therefore, using Eq. (S1), and differentiating Eq. (S2) at constant  $\beta$ -CD concentration, changes in  $\beta$ -CD chemical potential can be determined by:

$$d\mu_{CD}(m_{CC}, m_u) = d\mu_{CD}^0(m_{CC}, m_u) = d\Delta\bar{G}_{CD}^0 = -RTd\ln C_{CD}^{sat} \quad (S4)$$

where  $\Delta\bar{G}_{CD}^0(m_{CC}, m_u) = -RT\ln C_{CD}^{sat}$  is  $\beta$ -CD's solvation free energy. Experimentally determined  $C_{CD}^{sat}$  and  $\Delta\bar{G}_{CD}^0$  values in the single-DES component (CC or urea) aqueous solutions are in Tables S1 and S2, and values for the two-component solution are in Table S3.

Table S1:  $\beta$ -CD solubility and standard free energy of solvation in aqueous CC solutions.

| CC molality | $\beta$ -CD solubility (M) | $\Delta\bar{G}_{CD}^0$ , J/mol |
|-------------|----------------------------|--------------------------------|
| 0.000       | 0.015                      | 10431.886                      |
| 0.796       | 0.016                      | 10239.509                      |
| 1.791       | 0.019                      | 9842.677                       |
| 3.069       | 0.025                      | 9125.297                       |
| 4.775       | 0.040                      | 8007.056                       |
| 7.162       | 0.081                      | 6241.688                       |
| 10.743      | 0.177                      | 4293.317                       |
| 9.116       | 0.120                      | 5261.540                       |
| 15.011      | 0.071                      | 6572.203                       |
| 19.977      | 0.024                      | 9214.542                       |
| 24.930      | 0.078                      | 6320.834                       |

Table S2:  $\beta$ -CD solubility and standard free energy of solvation in aqueous urea solutions.

| Urea molality | $\beta$ -CD solubility (M) | $\Delta\bar{G}_{CD}^0$ , J/mol |
|---------------|----------------------------|--------------------------------|
| 0.000         | 0.015                      | 10431.886                      |
| 0.997         | 0.026                      | 9076.446                       |
| 0.250         | 0.020                      | 9753.193                       |
| 0.376         | 0.020                      | 9643.354                       |
| 0.500         | 0.022                      | 9508.927                       |
| 0.751         | 0.024                      | 9253.580                       |
| 4.166         | 0.061                      | 6940.642                       |
| 6.985         | 0.107                      | 5536.929                       |
| 11.119        | 0.180                      | 4256.378                       |
| 13.637        | 0.221                      | 3738.786                       |
| 1.250         | 0.028                      | 8849.086                       |
| 1.499         | 0.031                      | 8620.437                       |
| 1.752         | 0.034                      | 8383.256                       |
| 2.003         | 0.036                      | 8213.775                       |
| 2.502         | 0.043                      | 7816.314                       |
| 3.499         | 0.051                      | 7355.208                       |
| 4.999         | 0.074                      | 6452.849                       |
| 5.979         | 0.090                      | 5958.892                       |
| 7.975         | 0.125                      | 5160.052                       |
| 8.944         | 0.142                      | 4830.782                       |
| 3.499         | 0.051                      | 7355.208                       |
| 4.999         | 0.074                      | 6452.849                       |
| 5.979         | 0.090                      | 5958.892                       |
| 7.975         | 0.125                      | 5160.052                       |
| 8.944         | 0.142                      | 4830.782                       |
| 10.018        | 0.162                      | 4512.893                       |

Table S3:  $\beta$ -CD solubility and solvation free energy in aqueous mixtures of urea and CC.

| [urea], mol/kg | [CC], mol/kg | $\beta$ -CD solubility (M) | $\Delta\bar{G}_{CD}^0$ , J/mol |
|----------------|--------------|----------------------------|--------------------------------|
| 0.857          | 0.428        | 0.021                      | 9597.594                       |
| 1.319          | 0.659        | 0.024                      | 9247.322                       |
| 1.930          | 0.965        | 0.028                      | 8821.010                       |
| 3.306          | 1.653        | 0.037                      | 8158.234                       |
| 5.139          | 2.570        | 0.049                      | 7451.793                       |
| 7.700          | 3.851        | 0.071                      | 6550.039                       |
| 11.573         | 5.786        | 0.127                      | 5114.041                       |
| 17.837         | 8.918        | 0.242                      | 3518.529                       |
| 31.016         | 15.508       | 0.424                      | 2125.186                       |
| 14.926         | 7.463        | 0.196                      | 4039.837                       |
| 24.413         | 12.206       | 0.343                      | 2653.048                       |
| 2.454          | 6.221        | 0.078                      | 6320.089                       |
| 12.133         | 6.221        | 0.139                      | 4884.818                       |
| 19.323         | 6.221        | 0.217                      | 3788.197                       |
| 2.762          | 9.830        | 0.232                      | 3617.116                       |
| 7.668          | 9.830        | 0.213                      | 3831.192                       |
| 8.526          | 2.924        | 0.087                      | 6053.467                       |
| 2.580          | 2.924        | 0.054                      | 7214.535                       |
| 15.776         | 2.924        | 0.170                      | 4395.570                       |
| 6.432          | 6.175        | 0.100                      | 5706.701                       |
| 2.858          | 13.816       | 0.166                      | 4446.907                       |
| 3.008          | 18.502       | 0.134                      | 4985.178                       |
| 3.371          | 24.474       | 0.157                      | 4585.613                       |
| 28.055         | 14.881       | 0.454                      | 1959.224                       |
| 22.402         | 11.882       | 0.378                      | 2408.447                       |
| 19.255         | 10.213       | 0.328                      | 2760.078                       |
| 13.357         | 7.085        | 0.182                      | 4223.407                       |
| 5.974          | 3.168        | 0.063                      | 6837.080                       |
| 4.079          | 2.164        | 0.048                      | 7548.543                       |
| 30.192         | 13.955       | 0.436                      | 2058.575                       |
| 27.708         | 12.807       | 0.423                      | 2135.329                       |
| 25.379         | 11.730       | 0.378                      | 2408.447                       |
| 21.948         | 10.144       | 0.336                      | 2701.084                       |
| 13.645         | 6.307        | 0.170                      | 4397.447                       |
| 5.269          | 1.790        | 0.061                      | 6945.807                       |
| 16.968         | 7.843        | 0.243                      | 3505.560                       |
| 17.651         | 10.520       | 0.293                      | 3046.342                       |
| 18.910         | 7.934        | 0.236                      | 3582.904                       |
| 14.492         | 8.540        | 0.229                      | 3654.511                       |
| 9.001          | 5.328        | 0.108                      | 5523.815                       |
| 15.746         | 6.852        | 0.196                      | 4042.242                       |
| 10.004         | 4.350        | 0.107                      | 5548.565                       |
| 20.084         | 10.042       | 0.301                      | 2974.947                       |
| 15.915         | 7.958        | 0.225                      | 3700.078                       |
| 19.274         | 19.122       | 0.404                      | 2244.094                       |
| 3.016          | 13.953       | 0.275                      | 3196.024                       |
| 9.813          | 13.635       | 0.408                      | 2219.395                       |
| 32.988         | 11.984       | 0.449                      | 1984.360                       |
| 26.660         | 17.757       | 0.464                      | 1903.272                       |
| 23.868         | 20.845       | 0.465                      | 1900.231                       |
| 19.927         | 24.831       | 0.326                      | 2778.775                       |
| 27.042         | 9.425        | 0.402                      | 2260.048                       |
| 19.795         | 14.918       | 0.416                      | 2173.547                       |
| 16.964         | 17.863       | 0.398                      | 2283.187                       |
| 12.942         | 21.720       | 0.273                      | 3217.758                       |
| 15.889         | 11.023       | 0.353                      | 2582.697                       |
| 12.956         | 16.018       | 0.375                      | 2430.093                       |
| 8.924          | 17.954       | 0.276                      | 3195.170                       |
| 6.938          | 24.614       | 0.169                      | 4403.000                       |

|        |        |       |          |
|--------|--------|-------|----------|
| 4.166  | 22.457 | 0.042 | 7834.744 |
| 4.007  | 20.002 | 0.066 | 6742.430 |
| 2.986  | 26.005 | 0.118 | 5295.089 |
| 4.974  | 14.817 | 0.286 | 3105.997 |
| 24.040 | 14.877 | 0.406 | 2233.258 |
| 22.078 | 17.006 | 0.392 | 2321.705 |
| 17.868 | 12.935 | 0.354 | 2573.820 |
| 14.849 | 13.899 | 0.338 | 2689.452 |
| 11.909 | 11.842 | 0.307 | 2926.498 |
| 11.006 | 9.017  | 0.209 | 3884.018 |
| 6.005  | 11.952 | 0.277 | 3181.828 |

Figure S2A shows polynomial fits that correspond to  $\Delta\bar{G}_{CD}^0$  in the aqueous single-DES component solutions (Tables S1 and S2). The lines in Figure S2A correspond to the following polynomial fits:

$$\begin{aligned}\Delta\bar{G}_{CD}^0(m_{CC}) &= 0.003 \times m_{CC}^6 - 0.217 \times m_{CC}^5 + 5.044 \times m_{CC}^4 + 43.719 \times m_{CC}^3 + 103.560 \times m_{CC}^2 \\ &\quad - 432.035 \times m_{CC} + 10431.886 \\ \Delta\bar{G}_{CD}^0(m_u) &= -1.035 \times m_u^3 + 47.552 \times m_u^2 - 910.662 \times m_u + 9926.914\end{aligned}\quad (S5)$$

$\beta$ -CD solubility in aqueous urea and CC solutions (Tables S1-3) was fitted to the following 10-parameter ( $p+q \leq 4$ ) 2D fit (Figure 1a in the manuscript):

$$m_{CD}^{sat}(m_{CC}, m_u) = \sum_{p,q} F_{p,q} m_u^q m_{CC}^p \quad (S6)$$

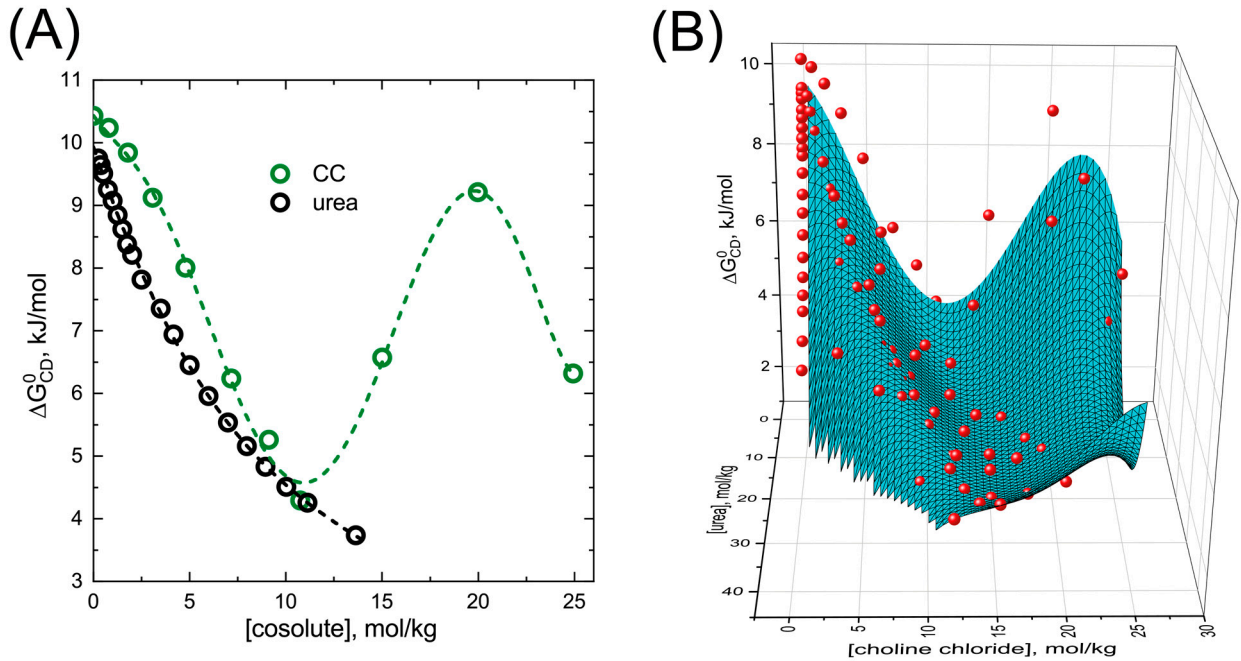

**Figure S2:**  $\beta$ -CD solvation free energy in aqueous solution of (A) single-DES component and (B) both components as a function urea and CC concentration. Dashed lines in panel (A) and cyan surface in panel (B) correspond to the fits described in the text.

and the resulting fit parameters ( $F_{p,q}$  's corresponding to all  $p + q \leq 4$ ) are in Table S4.

Table S4: Polynomial fit parameters for Eq. (S6).

| parameter | value     |
|-----------|-----------|
| $F_{0,0}$ | 0.01487   |
| $F_{0,1}$ | 0.02163   |
| $F_{0,2}$ | -0.00179  |
| $F_{0,3}$ | 1.52E-04  |
| $F_{0,4}$ | -1.48E-06 |
| $F_{1,0}$ | -0.03399  |
| $F_{1,1}$ | -0.00113  |
| $F_{1,2}$ | -2.65E-04 |
| $F_{1,3}$ | -2.37E-06 |
| $F_{2,0}$ | 0.01071   |
| $F_{2,1}$ | 4.19E-04  |
| $F_{2,2}$ | 1.03E-05  |
| $F_{3,0}$ | -7.96E-04 |
| $F_{3,1}$ | -1.44E-05 |
| $F_{4,0}$ | 1.69E-05  |

$\beta$ -CD solvation free energy in aqueous urea and CC solutions (Tables S1-3) was fitted to a similar 10-parameter ( $p + q \leq 4$ ) 2D fit (Figure S2b):

$$\Delta \bar{G}_{CD}^0(m_{CC}, m_u) = \sum_{p,q} K_{p,q} m_u^q m_{cc}^p \quad (S7)$$

and the resulting fit parameters ( $K_{p,q}$  's corresponding to all  $p + q \leq 4$ ) are in Table S5.

Table S5: Polynomial fit parameters for Eq. (S7).

| parameter | value     |
|-----------|-----------|
| $K_{0,0}$ | 10431.886 |
| $K_{0,1}$ | -640.576  |
| $K_{0,2}$ | 17.910    |
| $K_{0,3}$ | -1.188    |
| $K_{0,4}$ | 0.012     |
| $K_{1,0}$ | -348.798  |
| $K_{1,1}$ | 106.620   |
| $K_{1,2}$ | 1.413     |
| $K_{1,3}$ | 0.017     |
| $K_{2,0}$ | -107.043  |
| $K_{2,1}$ | -9.769    |
| $K_{2,2}$ | -0.038    |
| $K_{3,0}$ | 10.980    |
| $K_{3,1}$ | 0.221     |
| $K_{4,0}$ | -0.253    |

### S3. Calculation of CC and urea chemical potential in the low concentration regime

In a three-component solution composed of water (1), and two cosolutes (2 and 3), the Gibbs free energy differential is:

$$dG = -SdT + VdP + \mu_1 dn_1 + \mu_2 dn_2 + \mu_3 dn_3 \quad (\text{S8})$$

Allowing to derive the following equality as a cross-differentiation relation:[1]

$$\left( \frac{\partial \mu_2}{\partial m_3} \right)_{T,P,m_2} = \left( \frac{\partial \mu_3}{\partial m_2} \right)_{T,P,m_3} \quad (\text{S9})$$

Following the methodology developed of Robinson and Stokes,[1] we represent these derivatives by a 2-dimentional polynomial expansion in cosolute concentration of the form:

$$\left( \frac{\partial \mu_2}{\partial m_3} \right)_{T,P,m_2} = \left( \frac{\partial \mu_3}{\partial m_2} \right)_{T,P,m_3} = \sum_{p,q} \frac{(q+1)(p+1)}{p+q+1} A_{p,q} m_2^p m_3^q \quad (\text{S10})$$

where  $p, q \geq 0$  are integers, and  $A_{p,q}$  are fit parameters.

Integration of Eq. (S10) yields the chemical potential of both cosolutes:

$$\begin{aligned} \mu_2 &= \mu_2^0(m_2) + \sum_{p,q} \frac{(p+1)}{p+q+1} A_{p,q} m_2^p m_3^{q+1} \\ \mu_3 &= \mu_3^0(m_3) + \sum_{p,q} \frac{(q+1)}{p+q+1} A_{p,q} m_2^{p+1} m_3^q \end{aligned} \quad (\text{S11})$$

where  $\mu_2^0$  and  $\mu_3^0$  are the chemical potentials of both cosolutes in their respective single-cosolute solutions.

Next, we use the following set of Gibbs-Duhem equations applied to the two-cosolute solution and the single-cosolute solutions of each of the cosolutes:

$$\begin{aligned} -m_1 d\mu_1 &= m_2 d\mu_2 + m_3 d\mu_3 \\ d\mu_2^0 &= -\frac{m_1}{m_2} d\mu_{1,2} \\ d\mu_3^0 &= -\frac{m_1}{m_3} d\mu_{1,3} \end{aligned} \quad (\text{S12})$$

where  $\mu_{1,2}$  and  $\mu_{1,3}$  are the chemical potentials of water in the single cosolutes solutions.



Combining the set of equations in Eq. (S12) with the cosolute chemical potentials in Eq. (S11), the following exact differential is obtained:

$$d\Delta = \left[ \sum_{p,q} (q+1) A_{p,q} m_2^{p+1} m_3^q \right] dm_2 + \left[ \sum_{p,q} (p+1) A_{p,q} m_2^p m_3^{q+1} \right] dm_3 \quad (\text{S13})$$

where

$$\Delta \equiv -m_1 (\mu_1 - \mu_{1,2} - \mu_{1,3}) \quad (\text{S14})$$

Water chemical potential can be calculated from activity measurements as  $\mu_1 = RT \ln a_1$ .

Because the activity of water approaches unity in the limit of low cosolute concentration,  $\lim_{m_2, m_3 \rightarrow 0} a_1 = 1$ , the following limit  $\lim_{m_2, m_3 \rightarrow 0} \Delta = 0$  also holds. Integration of Eq. (S13) leads to

$$\Delta = \sum_{p,q} A_{p,q} m_2^{p+1} m_3^{q+1} \quad (\text{S15})$$

Therefore, the parameters  $A_{p,q}$  that are required to evaluate changes in the cosolute chemical potential (Eq. (S11)), can therefore be extracted by fitting  $\Delta$  values (that are in turn calculated using activity measurements, Eq. (S14)) to Eq. (S15). However, it is numerically easier to instead fit the function  $D$ , defined as:

$$D \equiv \frac{\Delta}{m_2 m_3} = -\frac{m_1}{m_2 m_3} (\mu_1 - \mu_{1,2} - \mu_{1,3}) = \sum_{p,q} A_{p,q} m_2^p m_3^q \quad (\text{S16})$$

In addition, changes in the standard chemical potentials,  $\mu_2^0$  and  $\mu_3^0$ , that are required in Eq. (S11), can be calculated from Eq. (S12), so that:

$$\begin{aligned} \Delta \mu_2^0 &= -m_1 \int \frac{1}{m_2} d\mu_1(m_2) \\ \Delta \mu_3^0 &= -m_1 \int \frac{1}{m_3} d\mu_1(m_3) \end{aligned} \quad (\text{S17})$$

Importantly, we note that using Eq. (S17) is impossible for concentrations below the solubility limit. We therefore present a new and alternative method to calculate the chemical potentials in the following section.

In the study of DES (here, reline) in aqueous solutions, we use the notation of *cc* for component (2) and *u* for component (3). Results of water activity and chemical potential in aqueous single-DES component solutions of urea and CC are in Tables S6 and S7.

Table S6: Water activity and chemical potential in aqueous solutions of urea.

| [urea], mol/kg | $a_{w,u}$ (M) | $\mu_{w,u}$ , J/mol |
|----------------|---------------|---------------------|
| 2.000          | 0.968         | -81.264             |
| 2.993          | 0.954         | -116.738            |
| 4.013          | 0.939         | -155.233            |
| 4.992          | 0.926         | -190.853            |
| 6.032          | 0.912         | -229.301            |
| 7.000          | 0.900         | -260.496            |
| 7.986          | 0.887         | -297.392            |
| 8.996          | 0.875         | -331.160            |
| 9.973          | 0.864         | -363.385            |
| 11.005         | 0.852         | -397.197            |
| 11.970         | 0.839         | -434.577            |
| 0.998          | 0.984         | -41.230             |
| 1.200          | 0.981         | -48.816             |
| 1.400          | 0.978         | -56.134             |
| 1.601          | 0.975         | -63.496             |
| 1.803          | 0.972         | -70.680             |
| 1.997          | 0.969         | -77.864             |
| 2.123          | 0.966         | -84.780             |
| 0.101          | 0.998         | -4.075              |
| 0.177          | 0.997         | -6.723              |
| 0.253          | 0.996         | -10.129             |
| 0.506          | 0.991         | -21.374             |
| 0.763          | 0.987         | -32.008             |
| 1.012          | 0.983         | -41.899             |
| 1.271          | 0.979         | -52.013             |
| 1.520          | 0.976         | -61.146             |
| 1.765          | 0.972         | -70.234             |
| 2.017          | 0.968         | -79.560             |
| 2.513          | 0.962         | -95.858             |
| 2.996          | 0.956         | -110.705            |
| 2.000          | 0.968         | -81.264             |
| 2.993          | 0.954         | -116.738            |

Table S7: Water activity and chemical potential in aqueous solutions of CC.

| [CC], mol/kg | $a_{w,CC}$ (M) | $\mu_{w,CC}$ , J/mol |
|--------------|----------------|----------------------|
| 0.992        | 0.970          | -76.785              |
| 1.993        | 0.941          | -152.068             |
| 4.005        | 0.872          | -338.964             |
| 5.990        | 0.797          | -564.033             |
| 7.843        | 0.725          | -798.902             |
| 9.731        | 0.656          | -1047.005            |
| 14.591       | 0.504          | -1700.005            |
| 20.180       | 0.379          | -2407.094            |
| 23.182       | 0.329          | -2753.215            |

Figure S3A shows polynomial fits corresponding to  $\mu_w$  in the aqueous single-DES component solutions (Tables S6 and S7). The dashed lines in Figure S3A correspond to the following polynomial fits:

$$\begin{aligned}\mu_{w,CC} &= 0.130 \times m_{CC}^3 - 5.152 \times m_{CC}^2 - 68.781 \times m_{CC} \\ \mu_{w,u} &= 0.317 \times m_u^2 - 39.77 \times m_u\end{aligned}\tag{S18}$$

These polynomials were then used to calculate the values of  $D$ . Table S8 shows the resulting water activity in urea and CC mixtures, along with the corresponding  $D$  values (presented in Figure S3B).

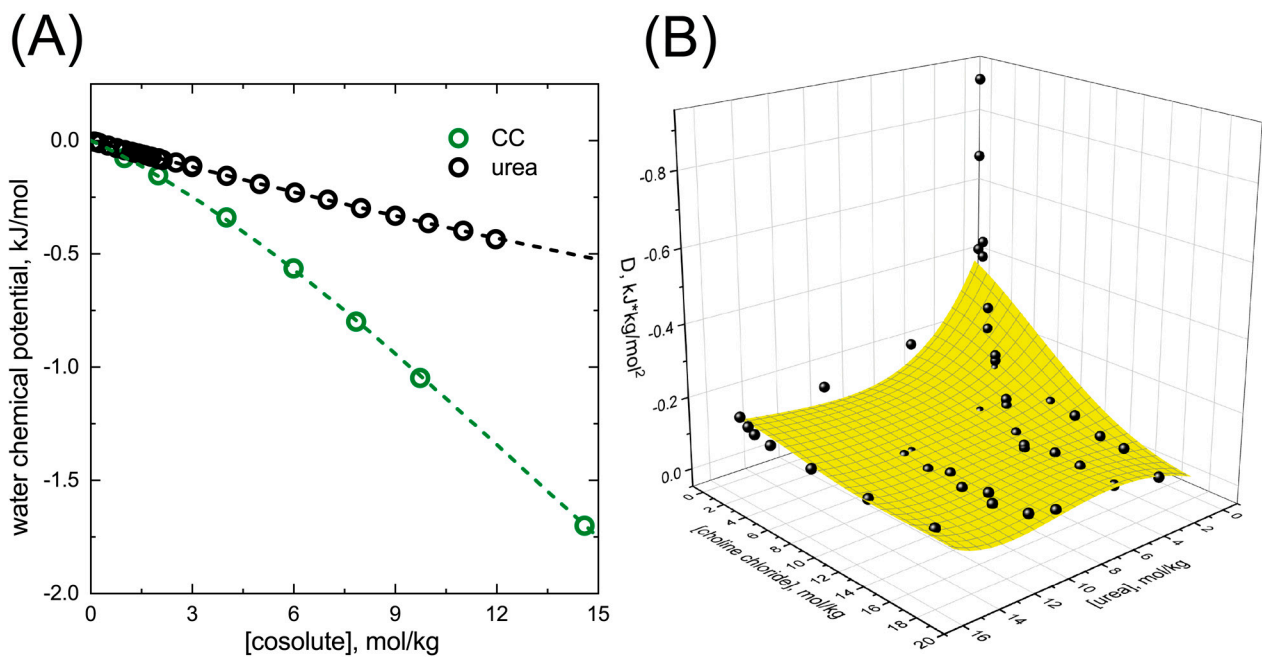

**Figure S3:** (A) Water chemical potential in aqueous single-DES component solutions of urea and CC as a function of concentration. Dashed lines correspond to polynomial fits (see text for details). (B)  $D$  as a function of urea and CC concentration. Yellow surface represents the fit to the functional form in Eq. (S16).

Table S8: Water activity and  $D$  at different urea and CC concentrations.

| [urea], mol/kg | [CC], mol/kg | $a_{w,u}$ | $D$ , J/(mol <sup>2</sup> /kg) |
|----------------|--------------|-----------|--------------------------------|
| 11.561         | 5.781        | 0.705     | -80.570                        |
| 7.747          | 3.873        | 0.796     | -109.788                       |
| 5.136          | 2.568        | 0.865     | -183.280                       |
| 3.300          | 1.650        | 0.911     | -239.751                       |
| 1.925          | 0.962        | 0.949     | -467.564                       |
| 0.855          | 0.428        | 0.976     | -697.793                       |
| 11.514         | 5.757        | 0.708     | -86.266                        |
| 7.643          | 3.821        | 0.801     | -126.184                       |
| 5.118          | 2.559        | 0.866     | -198.177                       |
| 3.295          | 1.647        | 0.913     | -300.696                       |
| 1.920          | 0.960        | 0.948     | -425.394                       |
| 0.844          | 0.422        | 0.977     | -911.347                       |
| 17.573         | 8.787        | 0.583     | -64.170                        |
| 11.566         | 5.783        | 0.704     | -77.237                        |
| 7.694          | 3.847        | 0.797     | -109.429                       |
| 5.109          | 2.555        | 0.863     | -159.507                       |
| 3.297          | 1.649        | 0.910     | -207.953                       |
| 1.906          | 0.953        | 0.946     | -253.245                       |
| 0.855          | 0.428        | 0.976     | -428.623                       |
| 1.000          | 2.000        | 0.926     | -184.027                       |
| 4.002          | 2.000        | 0.889     | -143.204                       |
| 7.022          | 2.000        | 0.854     | -121.664                       |
| 9.025          | 1.999        | 0.833     | -111.149                       |
| 11.000         | 2.000        | 0.812     | -102.365                       |
| 12.989         | 1.999        | 0.790     | -74.312                        |
| 14.792         | 2.000        | 0.773     | -68.812                        |
| 0.998          | 4.999        | 0.825     | -207.228                       |

|        |        |       |          |
|--------|--------|-------|----------|
| 2.998  | 4.999  | 0.804 | -120.853 |
| 4.987  | 4.999  | 0.785 | -105.370 |
| 6.980  | 4.999  | 0.767 | -97.560  |
| 9.935  | 4.999  | 0.740 | -83.273  |
| 13.003 | 5.000  | 0.715 | -76.478  |
| 14.901 | 5.000  | 0.700 | -70.915  |
| 17.398 | 4.999  | 0.680 | -60.748  |
| 1.999  | 9.925  | 0.639 | -84.938  |
| 5.012  | 9.925  | 0.620 | -77.789  |
| 7.837  | 9.925  | 0.604 | -74.001  |
| 11.018 | 9.925  | 0.586 | -70.041  |
| 13.987 | 9.925  | 0.571 | -67.356  |
| 16.970 | 9.925  | 0.557 | -64.145  |
| 17.884 | 2.486  | 0.732 | -48.182  |
| 15.426 | 14.118 | 0.468 | -73.154  |
| 10.987 | 14.648 | 0.471 | -81.533  |
| 6.984  | 15.125 | 0.476 | -101.777 |
| 3.972  | 15.486 | 0.477 | -121.532 |
| 2.788  | 15.626 | 0.476 | -134.374 |
| 2.301  | 15.684 | 0.476 | -148.816 |
| 1.700  | 15.757 | 0.476 | -167.383 |
| 1.009  | 10.450 | 0.631 | -161.107 |
| 3.022  | 10.450 | 0.615 | -80.739  |
| 4.875  | 10.450 | 0.604 | -77.913  |
| 7.963  | 10.450 | 0.588 | -76.048  |
| 9.924  | 10.450 | 0.576 | -70.107  |
| 12.623 | 10.450 | 0.563 | -66.890  |
| 14.949 | 10.450 | 0.551 | -63.781  |

The fit parameters used to construct the surface fit in Figure S3B that correspond to all  $A_{p,q}$  for which  $p + q \leq 5$  are in Table S9.

Table S9: Polynomial fit parameters for  $D$ .

| parameter | value    |
|-----------|----------|
| $A_{0,0}$ | -425.017 |
| $A_{0,1}$ | 19.562   |
| $A_{0,2}$ | 2.589    |
| $A_{0,3}$ | -0.198   |
| $A_{0,4}$ | 0.004    |
| $A_{1,0}$ | 104.537  |
| $A_{1,1}$ | -9.281   |
| $A_{1,2}$ | 0.0615   |
| $A_{1,3}$ | 0.003    |
| $A_{2,0}$ | -11.783  |
| $A_{2,1}$ | 0.883    |
| $A_{2,2}$ | -0.008   |

|           |        |
|-----------|--------|
| $A_{3,0}$ | 0.568  |
| $A_{3,1}$ | -0.024 |
| $A_{4,0}$ | -0.011 |

#### S4. Determining the chemical potential of each DES component in highly dehydrated solutions

In a three-component solution composed of water (1), and two cosolutes (2 and 3), the Gibbs-Duhem equation (constant T and P) is:

$$0 = m_1 d\mu_1 + m_2 d\mu_2 + m_3 d\mu_3 \quad (\text{S19})$$

When changing solution composition for one cosolute while keeping that of the other cosolutes constant, we have:

$$\begin{aligned} \left( \frac{\partial \mu_3}{\partial m_3} \right)_{T,P,m_2} &= -\frac{m_1}{m_3} \left( \frac{\partial \mu_1}{\partial m_3} \right)_{T,P,m_2} - \frac{m_2}{m_3} \left( \frac{\partial \mu_2}{\partial m_3} \right)_{T,P,m_2} \\ \left( \frac{\partial \mu_2}{\partial m_2} \right)_{T,P,m_3} &= -\frac{m_1}{m_2} \left( \frac{\partial \mu_1}{\partial m_2} \right)_{T,P,m_3} - \frac{m_3}{m_2} \left( \frac{\partial \mu_3}{\partial m_2} \right)_{T,P,m_3} \end{aligned} \quad (\text{S20})$$

From Eqs. (S20) and (S9), the differentials of  $\mu_2$  and  $\mu_3$  are:

$$\begin{aligned}
d\mu_2 &= \left( \frac{\partial \mu_2}{\partial m_3} \right)_{T,P,m_2} dm_3 + \left( \frac{\partial \mu_2}{\partial m_2} \right)_{T,P,m_3} dm_2 = \\
&\left( \frac{\partial \mu_3}{\partial m_2} \right)_{T,P,m_3} dm_3 - \frac{m_1}{m_2} \left( \frac{\partial \mu_1}{\partial m_2} \right)_{T,P,m_3} dm_2 - \frac{m_3}{m_2} \left( \frac{\partial \mu_3}{\partial m_2} \right)_{T,P,m_3} dm_2 \\
d\mu_3 &= \left( \frac{\partial \mu_3}{\partial m_3} \right)_{T,P,m_2} dm_3 + \left( \frac{\partial \mu_3}{\partial m_2} \right)_{T,P,m_3} dm_2 = \\
&\left( \frac{\partial \mu_2}{\partial m_3} \right)_{T,P,m_2} dm_2 - \frac{m_1}{m_3} \left( \frac{\partial \mu_1}{\partial m_3} \right)_{T,P,m_2} dm_3 - \frac{m_2}{m_3} \left( \frac{\partial \mu_2}{\partial m_3} \right)_{T,P,m_2} dm_3
\end{aligned} \tag{S21}$$

As described in the previous section, integration of Eq. (S21) is required in order to determine values of the chemical potential of cosolutes. However, although any arbitrarily reference states and path integrals can be chosen, only a few result in simple analytical expressions, and even fewer are compatible with the experimental analysis. For example, the method described by Robinson and Stokes is inapplicable to calculate changes in chemical potential of cosolutes in mixtures beyond their aqueous solubility (see Eq. (S17)). Because it is impossible to directly measure changes in cosolute chemical potentials, choosing a different path integral can be challenging as long as the partial derivatives in Eq. (S21) are unresolved. However, we show that a carefully thought-out path integral allows to calculate

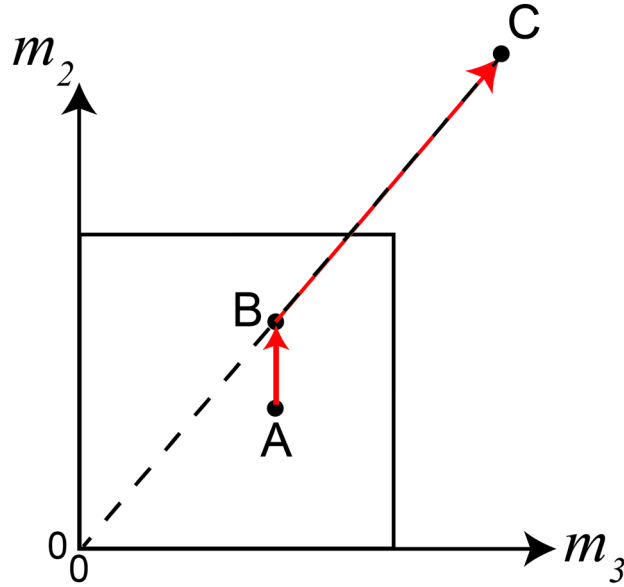

**Figure S4:** Schematic representation of the path integral required for cosolute chemical potential determination in the high concentration regime (see text for details). The square region corresponds to the region where both cosolutes are fully miscible in water.

the chemical potentials even without the evaluation of these partial derivatives. The process is detailed in the following.

Say we are interested in determining the chemical potential of cosolute 2 with concentrations  $m_2^C$  and cosolute 3 with concentration  $m_3^C$  so that the concentration ratio is  $z = m_2^C / m_3^C$  (point C in Figure S4). The starting point of the path integral is an arbitrarily chosen point with cosolute concentrations of  $m_2^A$  and  $m_3^A$  (point A in Figure S4), which is used to define the standard chemical potential. Importantly, the concentrations of A must be sufficiently low, so that it is included within the concentration range used in the preceding chemical potential analysis (SI section S3).

The path integral is now divided into two parts:

In step one ( $A \rightarrow B$ , Figure S4)  $m_2$  is varied from  $m_2^A$  to  $m_2^B = m_3^B m_2^C / m_3^C = z m_3^B$ , while keeping  $m_2 = m_2^A = m_2^B$  constant. As long as the concentrations of point “B” are also within the low concentration regime, changes in the chemical potentials can be calculated using the set of equations (S11), so that

$$\begin{aligned}\mu_2^B - \mu_2^A &= \mu_2^0(m_2^B = z m_3^A) - \mu_2^0(m_2^A) + \sum_{p,q} \frac{p+1}{p+q+1} A_{p,q} m_3^{A,q+1} (z m_3^A - m_2^A) \\ \mu_3^B - \mu_3^A &= \sum_{p,q} \frac{q+1}{p+q+1} A_{p,q} m_3^{A,q} (z^{p+1} m_3^{A,p+1} - m_2^{A,p+1})\end{aligned}\quad (S22)$$

where changes in the chemical potential in the single cosolute solutions are calculated using Eq. (S17):

$$\mu_2^0(m_2^B = z m_3^A) - \mu_2^0(m_2^A) = -m_1 \int_{m_2^A}^{m_2^B} \frac{1}{m_2} d\mu_1(m_2) \quad (S23)$$

The second step ( $B \rightarrow C$ , Figure S4) is a linear path defined by  $m_3 = z m_2$ , so that  $dm_3 = z dm_2$ . The equations in (S21) then reduces to:

$$\begin{aligned}d\mu_2 &= -\frac{m_1}{m_2} \left( \frac{\partial \mu_1}{\partial m_2} \right)_{T,P,m_3} dm_2 \\ d\mu_3 &= -\frac{m_1}{m_3} \left( \frac{\partial \mu_1}{\partial m_3} \right)_{T,P,m_2} dm_3\end{aligned}\quad (S24)$$

Eq. (S24) can be easily integrated, as the partial derivatives can be evaluated using water activity measurements. Table S10 shows water activity measurements and water chemical potential at varying urea and CC concentrations.

Table S10: Water activity and chemical potential at varying urea and CC concentrations.

| [urea], mol/kg | [CC], mol/kg | $a_w$ | $\mu_w$ , J/mol |
|----------------|--------------|-------|-----------------|
| 2.000          | 0.000        | 0.968 | -81.259         |
| 2.994          | 0.000        | 0.954 | -116.732        |
| 4.013          | 0.000        | 0.939 | -155.225        |
| 4.993          | 0.000        | 0.926 | -190.842        |
| 6.032          | 0.000        | 0.912 | -229.289        |
| 7.000          | 0.000        | 0.900 | -260.481        |
| 7.986          | 0.000        | 0.887 | -297.376        |
| 8.996          | 0.000        | 0.875 | -331.142        |
| 9.974          | 0.000        | 0.864 | -363.364        |
| 11.005         | 0.000        | 0.852 | -397.175        |
| 11.970         | 0.000        | 0.839 | -434.552        |
| 0.997          | 0.000        | 0.984 | -41.216         |
| 1.201          | 0.000        | 0.981 | -48.814         |
| 1.400          | 0.000        | 0.978 | -56.132         |
| 1.601          | 0.000        | 0.975 | -63.496         |
| 1.803          | 0.000        | 0.972 | -70.678         |
| 1.997          | 0.000        | 0.969 | -77.855         |
| 2.123          | 0.000        | 0.966 | -84.771         |
| 0.101          | 0.000        | 0.998 | -4.069          |
| 0.177          | 0.000        | 0.997 | -6.727          |



|         |        |       |           |
|---------|--------|-------|-----------|
| 0.253   | 0.000  | 0.996 | -10.134   |
| 0.506   | 0.000  | 0.991 | -21.360   |
| 0.763   | 0.000  | 0.987 | -32.009   |
| 1.012   | 0.000  | 0.983 | -41.897   |
| 1.271   | 0.000  | 0.979 | -52.002   |
| 1.520   | 0.000  | 0.976 | -61.132   |
| 1.765   | 0.000  | 0.972 | -70.219   |
| 2.017   | 0.000  | 0.968 | -79.544   |
| 2.513   | 0.000  | 0.962 | -95.851   |
| 2.997   | 0.000  | 0.956 | -110.711  |
| 23.145  | 11.572 | 0.503 | -1701.880 |
| 18.021  | 9.011  | 0.577 | -1364.854 |
| 11.561  | 5.781  | 0.705 | -865.084  |
| 7.747   | 3.873  | 0.796 | -565.869  |
| 5.136   | 2.568  | 0.865 | -360.783  |
| 3.300   | 1.650  | 0.911 | -231.193  |
| 1.925   | 0.962  | 0.949 | -130.620  |
| 0.855   | 0.428  | 0.976 | -59.532   |
| 0.406   | 0.203  | 0.990 | -24.287   |
| 69.302  | 34.651 | 0.209 | -3886.333 |
| 30.665  | 15.332 | 0.410 | -2208.599 |
| 18.025  | 9.012  | 0.578 | -1360.344 |
| 11.514  | 5.757  | 0.708 | -854.809  |
| 7.643   | 3.821  | 0.801 | -549.881  |
| 5.118   | 2.559  | 0.866 | -356.056  |
| 3.295   | 1.647  | 0.913 | -224.888  |
| 1.920   | 0.960  | 0.948 | -131.717  |
| 0.844   | 0.422  | 0.977 | -57.425   |
| 69.250  | 34.624 | 0.209 | -3881.226 |
| 30.608  | 15.304 | 0.409 | -2216.346 |
| 17.573  | 8.787  | 0.583 | -1336.514 |
| 11.566  | 5.783  | 0.704 | -869.410  |
| 7.694   | 3.847  | 0.797 | -562.352  |
| 5.109   | 2.555  | 0.863 | -364.570  |
| 3.297   | 1.649  | 0.910 | -234.133  |
| 1.906   | 0.953  | 0.946 | -136.479  |
| 0.855   | 0.428  | 0.976 | -61.284   |
| 145.092 | 72.544 | 0.120 | -5259.885 |
| 119.805 | 59.902 | 0.138 | -4911.102 |
| 101.696 | 50.848 | 0.158 | -4581.203 |
| 88.094  | 44.047 | 0.183 | -4206.994 |
| 77.496  | 38.747 | 0.204 | -3945.649 |
| 69.013  | 34.506 | 0.230 | -3644.462 |
| 62.065  | 31.032 | 0.246 | -3473.636 |
| 56.271  | 28.135 | 0.262 | -3322.997 |
| 51.366  | 25.683 | 0.283 | -3126.408 |
| 47.160  | 23.579 | 0.304 | -2949.561 |
| 43.513  | 21.757 | 0.323 | -2802.088 |
| 40.320  | 20.160 | 0.345 | -2634.755 |
| 37.501  | 18.751 | 0.361 | -2528.361 |
| 34.996  | 17.499 | 0.384 | -2370.573 |
| 32.754  | 16.377 | 0.406 | -2236.551 |
| 30.736  | 15.368 | 0.428 | -2106.213 |
| 1.000   | 2.000  | 0.926 | -189.959  |
| 4.002   | 2.000  | 0.889 | -290.538  |
| 7.022   | 2.000  | 0.854 | -389.970  |
| 9.025   | 1.999  | 0.833 | -454.035  |
| 11.000  | 2.000  | 0.812 | -515.616  |
| 12.989  | 1.999  | 0.790 | -585.349  |
| 14.792  | 2.000  | 0.773 | -639.295  |
| 18.024  | 1.999  | 0.741 | -742.703  |
| 18.348  | 2.000  | 0.738 | -754.101  |
| 0.998   | 4.999  | 0.825 | -477.156  |
| 2.998   | 4.999  | 0.804 | -540.153  |
| 4.987   | 4.999  | 0.785 | -599.515  |
| 6.980   | 4.999  | 0.767 | -657.229  |
| 9.935   | 4.999  | 0.740 | -745.715  |
| 13.003  | 5.000  | 0.715 | -830.363  |
| 14.901  | 5.000  | 0.700 | -883.425  |
| 17.398  | 4.999  | 0.680 | -957.081  |
| 18.699  | 5.000  | 0.670 | -993.081  |
| 5.005   | 19.787 | 0.376 | -2423.708 |
| 11.953  | 19.787 | 0.366 | -2494.226 |
| 18.400  | 19.786 | 0.356 | -2561.230 |
| 25.740  | 19.787 | 0.345 | -2634.755 |
| 32.964  | 19.786 | 0.335 | -2709.788 |
| 36.318  | 19.787 | 0.332 | -2732.823 |
| 44.314  | 19.787 | 0.321 | -2815.559 |
| 1.999   | 9.925  | 0.639 | -1111.111 |
| 5.012   | 9.925  | 0.620 | -1184.964 |
| 7.837   | 9.925  | 0.604 | -1251.827 |
| 11.018  | 9.925  | 0.586 | -1324.980 |

|         |         |       |           |
|---------|---------|-------|-----------|
| 13.987  | 9.925   | 0.571 | -1389.046 |
| 16.970  | 9.925   | 0.557 | -1452.138 |
| 19.935  | 9.925   | 0.543 | -1513.681 |
| 21.844  | 9.925   | 0.534 | -1553.718 |
| 26.790  | 9.925   | 0.514 | -1652.146 |
| 0.000   | 9.925   | 0.653 | -1057.178 |
| 66.897  | 32.689  | 0.216 | -3802.178 |
| 62.948  | 30.157  | 0.231 | -3630.162 |
| 56.400  | 25.956  | 0.261 | -3325.366 |
| 51.929  | 23.087  | 0.288 | -3085.621 |
| 43.001  | 17.360  | 0.356 | -2561.230 |
| 36.316  | 13.071  | 0.427 | -2109.404 |
| 31.033  | 9.682   | 0.502 | -1710.267 |
| 24.980  | 5.798   | 0.608 | -1233.004 |
| 20.765  | 3.094   | 0.695 | -901.902  |
| 18.534  | 1.662   | 0.742 | -739.027  |
| 72.094  | 36.024  | 0.198 | -4014.418 |
| 149.912 | 74.967  | 0.103 | -5624.813 |
| 125.936 | 61.544  | 0.125 | -5164.495 |
| 109.144 | 52.144  | 0.143 | -4815.887 |
| 86.635  | 39.542  | 0.182 | -4230.104 |
| 81.111  | 36.450  | 0.197 | -4028.228 |
| 74.840  | 32.940  | 0.216 | -3804.478 |
| 58.616  | 23.857  | 0.282 | -3142.208 |
| 36.673  | 11.573  | 0.455 | -1953.601 |
| 27.578  | 6.481   | 0.584 | -1331.546 |
| 21.441  | 3.045   | 0.691 | -916.927  |
| 19.199  | 1.791   | 0.735 | -764.878  |
| 16.001  | 0.000   | 0.795 | -568.050  |
| 831.636 | 415.870 | 0.050 | -7415.983 |
| 394.787 | 193.131 | 0.054 | -7248.915 |
| 241.004 | 114.722 | 0.080 | -6273.250 |
| 143.846 | 65.185  | 0.133 | -5000.785 |
| 103.314 | 44.520  | 0.180 | -4252.053 |
| 69.268  | 27.160  | 0.285 | -3109.839 |
| 46.046  | 15.320  | 0.386 | -2358.990 |
| 35.115  | 9.746   | 0.498 | -1726.131 |
| 28.880  | 6.567   | 0.577 | -1361.846 |
| 22.920  | 3.528   | 0.672 | -987.168  |
| 19.724  | 1.898   | 0.731 | -777.735  |
| 16.001  | 0.000   | 0.792 | -578.045  |
| 150.701 | 75.259  | 0.122 | -5222.917 |
| 111.961 | 60.024  | 0.147 | -4752.696 |
| 87.735  | 50.496  | 0.169 | -4406.985 |
| 57.027  | 38.418  | 0.209 | -3880.396 |
| 40.395  | 31.876  | 0.254 | -3400.933 |
| 30.066  | 27.814  | 0.278 | -3169.657 |
| 20.217  | 23.941  | 0.324 | -2794.423 |
| 10.142  | 19.978  | 0.383 | -2380.915 |
| 5.466   | 18.138  | 0.424 | -2129.806 |
| 0.000   | 15.989  | 0.474 | -1853.174 |
| 827.672 | 413.745 | 0.049 | -7465.860 |
| 416.403 | 216.096 | 0.062 | -6888.661 |
| 212.445 | 118.085 | 0.087 | -6044.364 |
| 95.256  | 61.765  | 0.144 | -4808.977 |
| 50.574  | 40.293  | 0.201 | -3982.080 |
| 31.341  | 31.050  | 0.254 | -3393.125 |
| 20.679  | 25.927  | 0.302 | -2966.319 |
| 11.823  | 21.670  | 0.357 | -2551.150 |
| 5.652   | 18.705  | 0.420 | -2151.558 |
| 0.000   | 15.989  | 0.475 | -1847.422 |
| 163.930 | 81.959  | 0.111 | -5442.312 |
| 132.936 | 70.856  | 0.128 | -5099.647 |
| 72.738  | 49.284  | 0.185 | -4189.467 |
| 57.419  | 43.796  | 0.184 | -4197.541 |
| 39.843  | 37.498  | 0.211 | -3854.439 |
| 25.526  | 32.369  | 0.240 | -3538.596 |
| 13.508  | 28.061  | 0.275 | -3203.724 |
| 7.346   | 25.854  | 0.296 | -3015.193 |
| 0.000   | 23.221  | 0.330 | -2746.672 |
| 25.755  | 12.878  | 0.461 | -1918.954 |
| 21.607  | 7.401   | 0.595 | -1289.072 |
| 22.297  | 8.312   | 0.569 | -1398.179 |
| 20.630  | 6.113   | 0.631 | -1141.371 |
| 23.334  | 9.682   | 0.533 | -1558.827 |
| 23.894  | 10.420  | 0.516 | -1640.587 |
| 19.257  | 4.300   | 0.682 | -948.708  |
| 18.851  | 3.762   | 0.698 | -892.113  |
| 17.884  | 2.486   | 0.732 | -771.975  |
| 16.934  | 1.233   | 0.763 | -669.215  |
| 21.976  | 13.336  | 0.464 | -1905.550 |
| 21.000  | 13.453  | 0.463 | -1907.155 |

|         |         |       |           |
|---------|---------|-------|-----------|
| 19.299  | 13.655  | 0.465 | -1897.543 |
| 15.426  | 14.118  | 0.468 | -1883.725 |
| 10.987  | 14.648  | 0.471 | -1867.349 |
| 6.984   | 15.125  | 0.476 | -1838.558 |
| 3.972   | 15.486  | 0.477 | -1836.998 |
| 2.788   | 15.626  | 0.476 | -1840.641 |
| 2.301   | 15.684  | 0.476 | -1838.558 |
| 1.700   | 15.757  | 0.476 | -1841.162 |
| 25.762  | 12.883  | 0.460 | -1925.144 |
| 0.257   | 15.928  | 0.478 | -1830.764 |
| 25.153  | 12.956  | 0.462 | -1913.047 |
| 847.309 | 423.549 | 0.054 | -7239.701 |
| 365.581 | 195.946 | 0.070 | -6584.752 |
| 169.496 | 101.496 | 0.099 | -5737.618 |
| 79.324  | 58.664  | 0.149 | -4724.194 |
| 54.455  | 46.849  | 0.172 | -4359.048 |
| 30.595  | 35.517  | 0.214 | -3821.792 |
| 15.468  | 28.332  | 0.259 | -3351.577 |
| 6.844   | 24.235  | 0.298 | -2998.517 |
| 0.000   | 20.984  | 0.334 | -2716.083 |
| 862.053 | 431.040 | 0.057 | -7083.749 |
| 106.437 | 44.929  | 0.201 | -3972.214 |
| 160.672 | 80.339  | 0.125 | -5148.617 |
| 109.832 | 51.608  | 0.170 | -4396.739 |
| 73.996  | 31.357  | 0.247 | -3465.295 |
| 48.561  | 16.982  | 0.376 | -2422.720 |
| 40.384  | 12.362  | 0.444 | -2012.629 |
| 31.137  | 7.136   | 0.569 | -1398.615 |
| 25.339  | 3.859   | 0.653 | -1056.419 |
| 21.908  | 1.920   | 0.711 | -846.878  |
| 18.511  | 0.000   | 0.769 | -649.808  |
| 0.000   | 10.450  | 0.634 | -1130.396 |
| 1.009   | 10.450  | 0.631 | -1142.550 |
| 3.022   | 10.450  | 0.615 | -1204.633 |
| 4.875   | 10.450  | 0.604 | -1248.133 |
| 7.963   | 10.450  | 0.588 | -1315.902 |
| 9.924   | 10.450  | 0.576 | -1365.714 |
| 12.623  | 10.450  | 0.563 | -1425.783 |
| 14.949  | 10.450  | 0.551 | -1477.427 |
| 18.064  | 10.450  | 0.538 | -1538.456 |
| 20.150  | 10.450  | 0.529 | -1576.556 |

We fitted the data in Table S10 to the following polynomial expansion (similar to the one in Eq. (S16)):

$$\mu_1 = \sum_{p,q} J_{p,q} m_2^p m_3^q \quad (\text{S25})$$

We found that a 10-parameter fit adequately represents the data. These parameters are presented in Table S11.

Table S11: Polynomial fit parameters for water chemical potential, Eq. (S25).

| parameter | value  |
|-----------|--------|
| $J_{0,0}$ | 41.359 |

|           |           |          |
|-----------|-----------|----------|
| $J_{p,q}$ | $J_{0,1}$ | -34.245  |
|           | $J_{0,2}$ | -0.186   |
|           | $J_{0,3}$ | 0.010    |
|           | $J_{0,4}$ | 0.00002  |
|           | $J_{1,0}$ | -105.364 |
|           | $J_{1,1}$ | 2.345    |
|           | $J_{1,2}$ | -0.037   |
|           | $J_{1,3}$ | 0.0002   |
|           | $J_{2,0}$ | -1.778   |
|           | $J_{2,1}$ | 0.002    |
|           | $J_{2,2}$ | 0.001    |
|           | $J_{3,0}$ | 0.050    |
|           | $J_{3,1}$ | 0.0003   |
|           | $J_{4,0}$ | 0.0004   |

Combining Eqs. (S25), (S24), and (S22), and replacing components (1-3) with (w, cc, and u), we obtain the expressions used in the manuscript for the chemical potential of the DES components (point C).

## S6. Preferential interaction coefficients

Fig S5 shows the PICs defined in Eq. 1 in the main text and calculated using Eqs. (S23), (S5) and (S18) for  $\beta$ -CD with urea and CC, each in its own aqueous single-DES component solution.

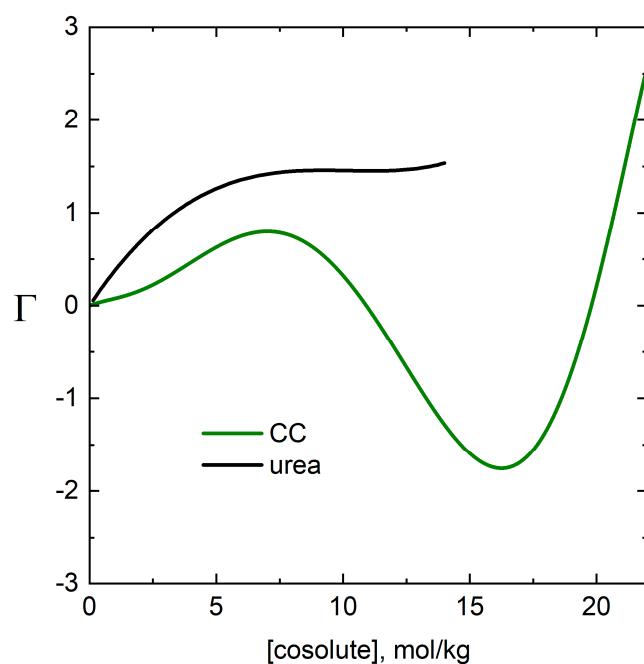

**Figure S5.** Single-DES component PICSs of  $\beta$ -CD with urea (in black) and CC (in green) versus concentration.

Fig S6 shows the PICSs defined in Eq. (1) in the main text and calculated using Eqs. (3) and (4) for urea and CC.

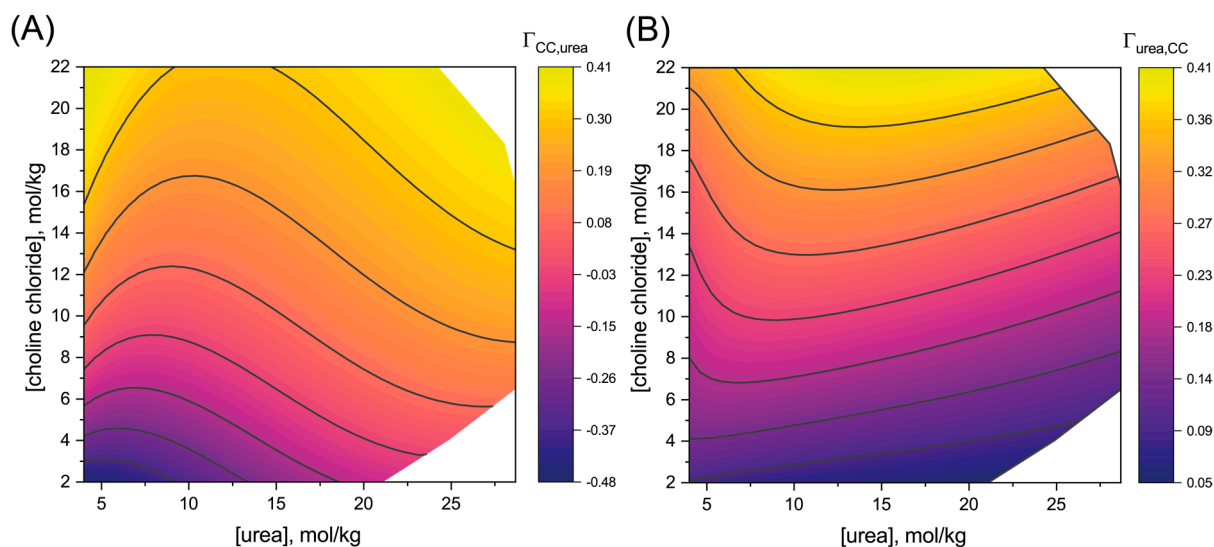

**Figure S6.** Contour plot of (A) CC and urea PICSs, and (B) urea and CC PICSs, calculated using Eqs. 6 and 7 of the main text and Eqs. (S23) and (S18).

## References

- [1] R.A. Robinson, R.H. Stokes, Electrolyte solutions, Courier Corporation, 2002.
